# Supplementary material
Source: publisher site journal article supplement (https://www.dovepress.com/article/478435)

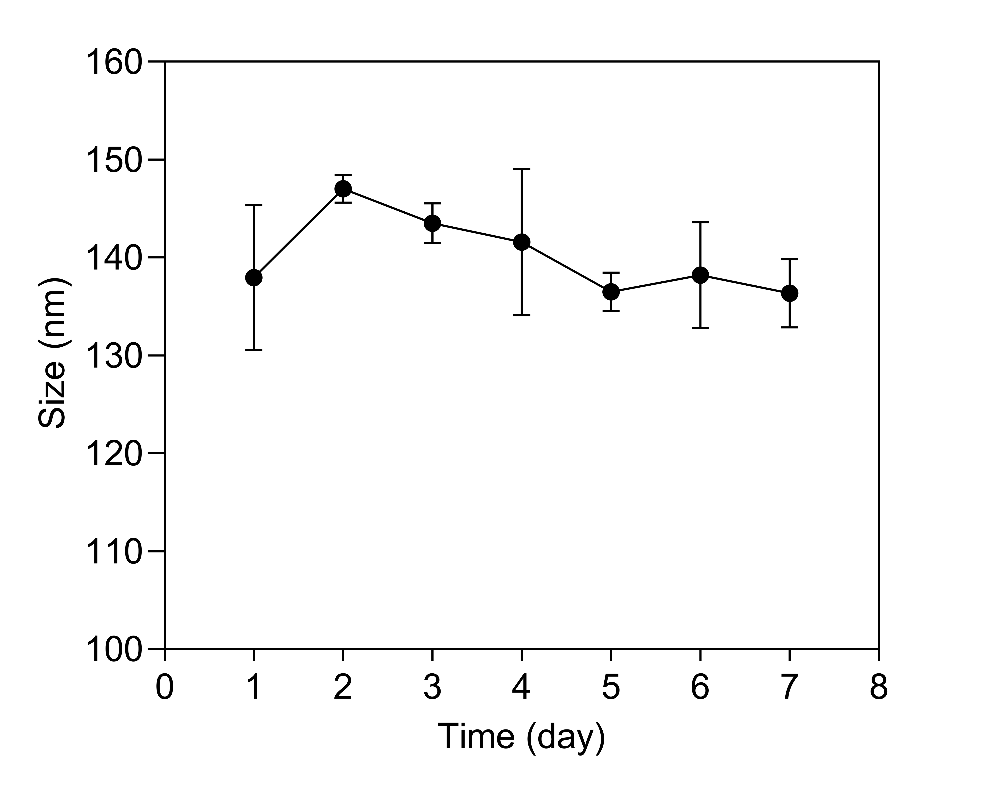


**Supplementary Figure 1**: Stability of GDNPs@ICG at different time points at 4°C and in PBS solution.

Supplement: Supplementary file 1 [file get_supplementary_file.php]
